# Supplementary material for: Effectiveness of a Locally Produced, Fish-Based Food Product on Weight Gain among Cambodian Children in the Treatment of Acute Malnutrition: A Randomized Controlled Trial
Source: PubMed Central journal article supplement (PMC6073612; doi:10.3390/nu10070909), 2018-07-16
Supplement: nutrients-10-00909-s001.pdf [file nutrients-10-00909-s001.pdf]

## Supplementary file

**Table 1.** Repeated measurement comparison between BP-100™ and NumTrey on anthropometric parameters using a linear mixed model adjusted for age, gender, and days in the effectiveness and efficacy analysis.

|               |                  | Effectiveness analysis |                   |                          |         | Efficacy analysis |                   |                          |         |
|---------------|------------------|------------------------|-------------------|--------------------------|---------|-------------------|-------------------|--------------------------|---------|
|               | Follow-up visits | BP-100™                | NumTrey           | Difference* <sup>1</sup> | p-Value | BP-100™           | NumTrey           | Difference* <sup>1</sup> | p-Value |
| Height (cm)   | Baseline         | 76.1 ± 0.5 (61)        | 76.7 ± 0.5 (60)   | −0.7 ± 0.7               | 0.352   | 76.5 ± 0.4 (60)   | 76.3 ± 0.4 (61)   | 0.1 ± 0.3                | 0.644   |
|               | Week 2 follow-up | 76.2 ± 0.5 (43)        | 76.9 ± 0.5 (45)   | −0.0 ± 0.2               | 0.848   | 76.6 ± 0.4 (41)   | 76.5 ± 0.4 (47)   | 0.0 ± 0.2                | 0.989   |
|               | Week 4 follow-up | 76.4 ± 0.5 (33)        | 76.9 ± 0.5 (37)   | 0.2 ± 0.2                | 0.332   | 76.8 ± 0.4 (34)   | 76.5 ± 0.4 (36)   | 0.2 ± 0.2                | 0.309   |
|               | Week 6 follow-up | 76.4 ± 0.5 (28)        | 77.1 ± 0.5 (39)   | −0.0 ± 0.2               | 0.906   | 76.9 ± 0.4 (29)   | 76.6 ± 0.4 (38)   | 0.1 ± 0.2                | 0.532   |
|               | Endline          | 76.7 ± 0.5 (38)        | 76.9 ± 0.5 (37)   | 0.5 ± 0.2                | 0.016   | 77.1 ± 0.4 (39)   | 76.5 ± 0.4 (36)   | 0.4 ± 0.2                | 0.043   |
| HAZ (z-score) | Baseline         | −2.32 ± 0.17 (61)      | −2.15 ± 0.17 (60) | −0.17 ± 0.24             | 0.487   | −2.31 ± 0.14 (60) | −2.16 ± 0.14 (61) | −0.15 ± 0.14             | 0.270   |
|               | Week 2 follow-up | −2.31 ± 0.18 (43)      | −2.15 ± 0.17 (45) | 0.01 ± 0.09              | 0.876   | −2.29 ± 0.15 (41) | −2.17 ± 0.14 (47) | 0.03 ± 0.10              | 0.785   |
|               | Week 4 follow-up | −2.26 ± 0.18 (33)      | −2.17 ± 0.18 (37) | 0.08 ± 0.10              | 0.417   | −2.26 ± 0.15 (34) | −2.17 ± 0.14 (36) | 0.05 ± 0.10              | 0.622   |
|               | Week 6 follow-up | −2.30 ± 0.18 (28)      | −2.12 ± 0.18 (39) | −0.00 ± 0.11             | 0.989   | −2.27 ± 0.15 (29) | −2.15 ± 0.14 (38) | 0.03 ± 0.11              | 0.767   |
|               | Endline          | −2.23 ± 0.18 (38)      | −2.23 ± 0.18 (37) | 0.17 ± 0.10              | 0.091   | −2.25 ± 0.15 (39) | −2.21 ± 0.15 (36) | 0.11 ± 0.10              | 0.282   |

Data are reported as mean ± SE (n). \* Adjusted for baseline values.<sup>1</sup> Calculated from baseline to endline with a mean duration of 56 days of treatment. Statistical significance level  $p < 0.05$ . Abbreviation; HAZ = height-for-age z-score.
